# Supplementary material for: Preparation of high self-healing efficient crosslink HTPB adhesive for improving debonding of propellant interface
Source: Royal Society of Chemistry journal article supplement (doi:10.1039/d0nj04085a), 2020-01-01
Supplement: d0nj04085a1.pdf [file d0nj04085a1.pdf]

## Supporting Information

### Preparation of high self-healing efficiency crosslink HTPB adhesive for improving debonding of propellant interface

Jing Tu, Heng Xu, Li Liang, Pinyun Li, Xiaode Guo\*

National Special Superfine Powder Engineering Technology Research Center, Nanjing University of Science and Technology, Nanjing 210094, China.

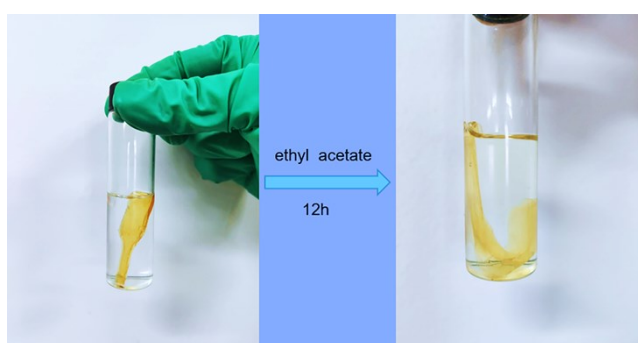

Figure S1. Swelling character of the PUSS sample

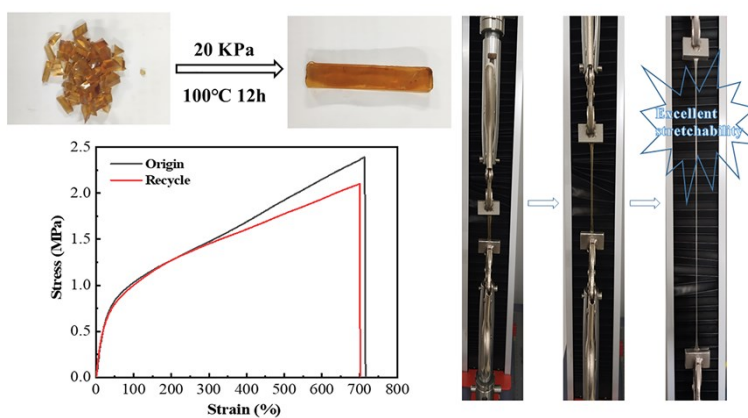

Figure S2. PUSS-2 has recyclability and high stretchability.
